# Supplementary material for: Short Linear Motifs recognized by SH2, SH3 and Ser/Thr Kinase domains are conserved in disordered protein regions
Source: PubMed Central journal article supplement (PMC2559891; doi:10.1186/1471-2164-9-s2-s26), 2008-09-16
Supplement: 1471-2164-9-S2-S26-S1.pdf [file 1471-2164-9-S2-S26-S1.pdf]

## **ADDITIONAL MATERIALS AND METHODS**

### **SH2, SH3 and S/T Kinase Motifs used in this study**

21 SH2-binding motifs analyzed were Src, Fyn, Lck, Fgr, Abl, Crk, Nck, p85N, p85C, PLC $\gamma$ 1N, PLC $\gamma$ 1C and SHPTP2N [1]; Csk, 3BP2, Fes, GRB2, SHC, Syk and Vav [2]; Shb [3]; and Itk [4]. 8 SH3 motifs are Src, Yes, Abl, Cortactin, p53bp2, PLC $\gamma$ , Crk and Grb2 [5]; 10 Ser/Thr kinase motifs selected in this study (mainly in basophilic group which is the largest Ser/Thr kinase group) are NIMA, PhK, CamK, [6], PKA, SLK1 [2], AKT [7], PKC [8], SRPK2 [9], MAPKAPK-2 [10] and CLK2 [11].

### **Calculation of domain and kinase selectivity values**

For a putative SLiM, the selectivity value for domains were calculated as the product of enrichment values from peptide library experiments [10, 12]. For example, to calculate the Src SH2 selectivity value of the SLiM YENF, we found the enrichment values for E(Y+1) and N(Y+2) for Src SH2 (Table S1) are 2.5 and 2.4, respectively. No enrichment value for F(Y+3) was found (thus Y+3 does not contribute to the final value) and the selectivity value is the product of the two enrichment values ( $2.5 \times 2.4 = 6.0$ ). The enrichment values for SH3 domain recognized motifs were assigned based on amino acid sequence of peptides expressed by SH3-binding phage clones [5].

### **Definition of frequent, occasional and rare binding partner (substrate) group**

For SH2 and SH3 domains, frequent, occasional and rare binding partner groups are defined by setting thresholds of the percentage of proteins in the functional group that interact with proteins containing that domain according to Hprd data set [13]. The thresholds are >10%, 1-10% and <1% for frequent, occasional and rare binding partners respectively. For S/T Kinases, we set thresholds with the ratio of Serine phosphorylation according to PhosphoELM [14] >2.5‰, 1-2.5‰, <1‰ for frequent, occasional and rare substrate groups respectively. In order to make the results more reliable, we excluded those protein functional groups that have fewer than 300 YXXX motifs for SH2 domains (26 functional groups remained), fewer than 150 PXXP motifs for SH3 domains (31 functional groups remained) and fewer than 2000 Ser-SLiMs for S/T Kinase domains (23 functional groups remained).

**Table S1 Enrichment values for the Src SH2 domain**

|             |             |             |
|-------------|-------------|-------------|
| <b>PY+1</b> | <b>pY+2</b> | <b>pY+3</b> |
| E(2.5)      | E(2.6)      | I(3.6)      |
| D(1.7)      | N(2.4)      | M(2.5)      |
| T(1.7)      | Y(2.0)      | L(2.3)      |

**Table S2 Reported SH2 binding sites in 11 most studied RTKs**

| Sites        | ln(Cr) | Sequence  | SH2 domain (reference)                                                                       |
|--------------|--------|-----------|----------------------------------------------------------------------------------------------|
| <b>EGFR</b>  |        |           |                                                                                              |
| 727          | 0.494  | FGTVYKGLW | Shc (Schulze WX et. al. 2005)                                                                |
| 915          | 0.763  | GSKPYDGIP | Src (Stover DR. et. al. 1995)                                                                |
| 944          | 0.763  | TIDVYMIMV | p85 (Stover DR. et. al. 1995)                                                                |
| 978          | 0.564  | DPQRYLVIQ | Shp2 (Schulze WX et. al. 2005)                                                               |
| 998          | 0.203  | DSNFYRALM | Shc (Schulze WX et. al. 2005), Shp2 (Schulze WX et. al. 2005), Crk (Schulze WX et. al. 2005) |
| 1016         | 0.004  | DADEYLIPQ | PLCg1(Rotein et. al. 1992), Shp2 (Schulze WX et al. 2005)                                    |
| 1092         | -0.239 | PVPEYINQS | GRB2 (Batzer et. al. 1994, Schulze WX et. al. 2005)                                          |
| 1110         | 0.243  | QNPVYHNQP | GRB2 (Okutani et. al. 1994, Schulze WX et. al. 2005)                                         |
| 1125         | -0.742 | RDPHYQDPH | GRB2 (Schulze WX et al. 2005)                                                                |
| 1138         | 0.558  | GNPEYLNTV | GRB2 (Schulze WX et al. 2005)                                                                |
| 1197         | -0.049 | ENAEYLRVA | Shc (Sakaguchi et. al. 1998, Schulze WX et. al. 2005), PLCg1 (Chattopadhyay et. al. 1999)    |
| <b>ERBB2</b> |        |           |                                                                                              |
| 735          | 0.339  | FGTVYKGIW | Shc (Schulze WX et. al. 2005)                                                                |
| 952          | 0.548  | TIDVYMIMV | p85 (Ram TG et. al. 1996)                                                                    |
| 1005         | 0.153  | DSTFYRSLI | Shc (Schulze WX et. al. 2005)                                                                |
| 1023         | 0.873  | DAEEYLVPQ | Shp2 (Schulze WX et. al. 2005)                                                               |
| 1139         | 0.472  | PQPEYVNQP | GRB2 (Ricci A. et. al. 1995, Schulze WX et. al. 2005)                                        |
| 1196         | -0.271 | ENPEYLTPQ | Shc (Schulze WX et. al. 2005)                                                                |
| 1222         | 0.234  | DNLYYWDQD | Shc (Schulze WX et. al. 2005)                                                                |
| 1248         | 0.969  | ENPEYLGLD | Shc (Ricci A. et. al. 1995, Schulze WX et. al. 2005)                                         |
| <b>FGFR</b>  |        |           |                                                                                              |
| 463          | 0.433  | GVSEYELPE | Crk (Larsson, H et. al. 1999)                                                                |
| 730          | 0.099  | TNELYMMMR | PLCg1 (Mohammadi M et. al. 1991)                                                             |
| 766          | 0.694  | SNQEYLDLS | Shb (Cross MJ et. al. 2002), PLCg1 (Mohammadi M et. al. 1991)                                |
| <b>IGFIR</b> |        |           |                                                                                              |
| 973          | 0.588  | NGVLYASVN | Crk (Koval AP et. al. 1998) , Csk (Arbet-Engels C. et. al. 1999)                             |

|              |        |           |                                                                                                                                 |
|--------------|--------|-----------|---------------------------------------------------------------------------------------------------------------------------------|
| 980          | 0.182  | VNPEYFSAA | Crk (Koval AP et. al. 1998)                                                                                                     |
| 1346         | 0.583  | ERQPYAHMN | Csk (Arbet-Engels C. et. al. 1999), p85 (Seely BL. et. al. 1995), Shp2 (Seely BL. et. al. 1995),                                |
| <b>IR</b>    |        |           |                                                                                                                                 |
| 1185         | 1.045  | TRDIYETDY | Shp2 (Kharitononkov A et. al. 1995)                                                                                             |
| 1361         | 0.255  | EHIPYTHMN | Shp2 (Kharitononkov A et. al. 1995), Csk (Arbet-Engels C. et. al. 1999), p85 (Van Horn DJ. et. al. 1994)                        |
| <b>KIT</b>   |        |           |                                                                                                                                 |
| 568          | 0.926  | NGNNYVYID | Lck (Krystal GW et. al. 1998), Shp2 (Kozlowski M. et. al. 1998)                                                                 |
| 570          | 0.926  | NNYVYIDPT | Lck (Krystal GW et. al. 1998)                                                                                                   |
| 703          | 0.160  | EAALYKNLL | Grb2 (Thommes K et. al. 1999)                                                                                                   |
| 721          | 0.312  | STNEYMDMK | p85 (Herbst R et. al. 1995)                                                                                                     |
| 900          | 0.310  | PAEMYDIMK | Crk (Lennartsson J et. al. 2003)                                                                                                |
| 936          | 0.298  | TNHIYSNLA | Grb2 (Thommes K et. al. 1999)                                                                                                   |
| <b>MET</b>   |        |           |                                                                                                                                 |
| 1313         | 0.559  | PDPLYEVML | p85 (Maulik G. et. al. 2002)                                                                                                    |
| 1349         | 0.270  | IGEHYVHVN | Shc (Pelicci G. et. al. 1995)                                                                                                   |
| 1356         | 0.270  | VNATYVNVK | GRB2 (Ponzetto C. et. al. 1996), Shc (Pelicci G. et. al. 1995), Shp2 (Fixman ED. et. al. 1996), PLCg1 (Fixman ED. et. al. 1996) |
| <b>PDGFR</b> |        |           |                                                                                                                                 |
| 579          | 1.340  | DGHEYIYVD | Src (Mori S et. al. 1993), Shc (Yokote K et. al. 1994)                                                                          |
| 581          | 1.340  | HEYIYVDPM | Src (Mori S et. al. 1993)                                                                                                       |
| 716          | 0.243  | SAELYSNAL | GRB2 (Amidsson AK et. al. 1994)                                                                                                 |
| 740          | 1.340  | SDGGYMDMS | p85 (Panayotou G et. al. 1992), Shc (Yokote K et. al. 1994)                                                                     |
| 751          | 1.340  | ESVDYVPML | p85 (Panayotou G et. al. 1992), Shc (Yokote K et. al. 1994)                                                                     |
| 771          | 0.243  | ESSNYMAPY | Shc (Yokote K et. al. 1994)                                                                                                     |
| 1009         | 0.500  | SSVLYTAVQ | Shp2 (Lechleider RJ et. al. 1993)                                                                                               |
| 1021         | 1.340  | GDNDYIPL  | PLCg1 (Ronnstrand L et. al. 1992)                                                                                               |
| <b>RET</b>   |        |           |                                                                                                                                 |
| 981          | -0.101 | SEEMYRLML | Src (Encinas M et. al. 2004)                                                                                                    |
| 1015         | 1.306  | KRRDYLDLA | PLCg1 (Borrello, M et. al. 1996)                                                                                                |
| 1062         | 0.983  | ENKLYGMSD | Shc (Asai N et. al. 1996)                                                                                                       |
| 1096         | 1.185  | NDSVYANWM | GRB2 (Alberti, L et. al. 1998)                                                                                                  |
| <b>TKRA</b>  |        |           |                                                                                                                                 |
| 496          | 0.123  | ENPQYFSDA | Shc (Obermeier A et. al. 1993)                                                                                                  |
| 680          | 1.420  | YSTDYYRVG | Grb2 (MacDonald JI, et. al. 2000)                                                                                               |
| 681          | 0.927  | STDYYRVGG | Grb2 (MacDonald JI, et. al. 2000)                                                                                               |
| 757          | 0.098  | PPEVYAIMR | p85 (Obermeier A et. al. 1993)                                                                                                  |
| 791          | 0.094  | APPVYLDVL | Abl (Yano H et. al. 2000), Grb2 (MacDonald JI, et. al. 2000)                                                                    |

|               |       |           |                                                                      |
|---------------|-------|-----------|----------------------------------------------------------------------|
| <b>VEGFR2</b> |       |           |                                                                      |
| 801           | 0.646 | LKTGYLSIV | PLCg1 (Cunningham SA. et. al. 1997)                                  |
| 1175          | 0.048 | DGKDYIVLP | Shb (Holmqvist K. et. al. 2004), PLCg1 (Cunningham SA. et. al. 1997) |
| 1214          | 0.266 | PKFHYDNTA | Nck (Lamalice L et. al. 2006)                                        |

1. Songyang Z, Shoelson SE, Chaudhuri M, Gish G, Pawson T, Haser WG, King F, Roberts T, Ratnofsky S, Lechleider RJ *et al*: **SH2 domains recognize specific phosphopeptide sequences**. *Cell* 1993, **72**(5):767-778.
2. Songyang Z, Shoelson SE, McGlade J, Olivier P, Pawson T, Bustelo XR, Barbacid M, Sabe H, Hanafusa H, Yi T *et al*: **Specific motifs recognized by the SH2 domains of Csk, 3BP2, fps/fes, GRB-2, HCP, SHC, Syk, and Vav**. *Mol Cell Biol* 1994, **14**(4):2777-2785.
3. Karlsson T, Songyang Z, Landgren E, Lavergne C, Di Fiore PP, Anafi M, Pawson T, Cantley LC, Claesson-Welsh L, Welsh M: **Molecular interactions of the Src homology 2 domain protein Shb with phosphotyrosine residues, tyrosine kinase receptors and Src homology 3 domain proteins**. *Oncogene* 1995, **10**(8):1475-1483.
4. Bunnell SC, Diehn M, Yaffe MB, Findell PR, Cantley LC, Berg LJ: **Biochemical interactions integrating Itk with the T cell receptor-initiated signaling cascade**. *J Biol Chem* 2000, **275**(3):2219-2230.
5. Sparks AB, Rider JE, Hoffman NG, Fowlkes DM, Quillam LA, Kay BK: **Distinct ligand preferences of Src homology 3 domains from Src, Yes, Abl, Cortactin, p53bp2, PLCgamma, Crk, and Grb2**. *Proc Natl Acad Sci U S A* 1996, **93**(4):1540-1544.
6. Songyang Z, Lu KP, Kwon YT, Tsai LH, Filhol O, Cochet C, Brickey DA, Soderling TR, Bartleson C, Graves DJ *et al*: **A structural basis for substrate specificities of protein Ser/Thr kinases: primary sequence preference of casein kinases I and II, NIMA, phosphorylase kinase, calmodulin-dependent kinase II, CDK5, and Erk1**. *Mol Cell Biol* 1996, **16**(11):6486-6493.
7. Yaffe MB, Leparo GG, Lai J, Obata T, Volinia S, Cantley LC: **A motif-based profile scanning approach for genome-wide prediction of signaling pathways**. *Nat Biotechnol* 2001, **19**(4):348-353.
8. Nishikawa K, Sawasdikosol S, Fruman DA, Lai J, Songyang Z, Burakoff SJ, Yaffe MB, Cantley LC: **A peptide library approach identifies a specific inhibitor for the ZAP-70 protein tyrosine kinase**. *Mol Cell* 2000, **6**(4):969-974.
9. Wang HY, Lin W, Dyck JA, Yeakley JM, Songyang Z, Cantley LC, Fu XD: **SRPK2: a differentially expressed SR protein-specific kinase involved in mediating the interaction and localization of pre-mRNA splicing factors in mammalian cells**. *J Cell Biol* 1998, **140**(4):737-750.
10. Manke IA, Nguyen A, Lim D, Stewart MQ, Elia AE, Yaffe MB: **MAPKAP kinase-2 is a cell cycle checkpoint kinase that regulates the G2/M transition and S phase progression in response to UV irradiation**. *Mol Cell* 2005, **17**(1):37-48.
11. Nikolakaki E, Du C, Lai J, Giannakouros T, Cantley L, Rabinow L: **Phosphorylation by LAMMER protein kinases: determination of a consensus site, identification of in vitro**

- substrates, and implications for substrate preferences.** *Biochemistry* 2002, **41**(6):2055-2066.
12. Songyang Z, Cantley LC: **The use of peptide library for the determination of kinase peptide substrates.** *Methods Mol Biol* 1998, **87**:87-98.
  13. Peri S, Navarro JD, Kristiansen TZ, Amanchy R, Surendranath V, Muthusamy B, Gandhi TK, Chandrika KN, Deshpande N, Suresh S *et al*: **Human protein reference database as a discovery resource for proteomics.** *Nucleic Acids Res* 2004, **32**(Database issue):D497-501.
  14. Diella F, Cameron S, Gemund C, Linding R, Via A, Kuster B, Sicheritz-Ponten T, Blom N, Gibson TJ: **Phospho.ELM: a database of experimentally verified phosphorylation sites in eukaryotic proteins.** *BMC Bioinformatics* 2004, **5**:79.
